# Supplementary material for: Drug-utilisation profiles and COVID-19
Source: PubMed Central journal article supplement (PMC8076316; doi:10.1038/s41598-021-88398-y), 2021-04-26
Supplement: 41598_2021_88398_MOESM1_ESM.pdf [file 41598_2021_88398_MOESM1_ESM.pdf]

## Supplementary information

### Drug-utilisation Profiles and COVID-19

Valentina Orlando<sup>1,\*</sup>, Enrico Coscioni<sup>2</sup>, Ilaria Guarino<sup>1</sup>, Sara Mucherino<sup>1</sup>, Alessandro Perrella<sup>3</sup>,  
Ugo Trama<sup>4</sup>, Giuseppe Limongelli<sup>5,+</sup> and Enrica Menditto<sup>1,+,\*</sup>

<sup>1</sup>CIRFF, Center of Drug Utilisation and Pharmacoeconomics, University of Naples Federico II, Naples, 80131, Italy

<sup>2</sup>Division of Cardiac Surgery, AOU San Giovanni di Dio e Ruggi d'Aragona, Salerno, 84131, Italy

<sup>3</sup>Infectious Disease of Healthcare Direction, AORN Antonio Cardarelli, Naples, 80131, Italy

<sup>4</sup>Regional Pharmaceutical Unit, Campania Region, Naples, 80143, Italy

<sup>5</sup>Department of Translational Medical Science, University of Campania Luigi Vanvitelli, Monaldi Hospital, Naples, 80131, Italy

<sup>+</sup>These authors contributed equally to this work

[\\*valentina.orlando@unina.it](mailto:valentina.orlando@unina.it), [enrica.menditto@unina.it](mailto:enrica.menditto@unina.it)

| <b>Characteristics</b>         |                                                                                                                                                                    |
|--------------------------------|--------------------------------------------------------------------------------------------------------------------------------------------------------------------|
| Geographic area                | Campania, Italy                                                                                                                                                    |
| Population covered             | ~5.8 million inhabitants                                                                                                                                           |
| Age span covered               | Whole population                                                                                                                                                   |
| Time span covered <sup>b</sup> | 2010–2019                                                                                                                                                          |
| Scope                          | Drug utilisation and outcome research; real-world evidences for public health; pharmacoepidemiologic and pharmaco-economic analysis                                |
| Data sources                   | Specific fields in the data sources contributing to a database                                                                                                     |
| Demographic information        | Patient ID; sex; date of birth; municipality of residence; district; local health unit                                                                             |
| Outpatient pharmacy records    | Patient ID; drug code; prescription date; delivery date; quantity; ATC code; price; defined daily dose; drug distribution channel (file F, file D)                 |
| Hospital-discharge records     | Patient ID; type of admission; date of admission; reasons for discharge; diagnoses (ICD-9 code); procedures (ICD-9 code); date of discharge; disease-related group |
| Type of codes for diagnoses    | Hospital: ICD-9-CM                                                                                                                                                 |
| Type of codes for medications  | ATC classification                                                                                                                                                 |

ATC = Anatomical Therapeutic Chemical; ICD-9-CM = *International Classification of Diseases*, 9th Revision, Clinical Modification.

<sup>a</sup> For this study, outpatient pharmacy records were used to identify medication use.

<sup>b</sup> Time span covered was 2009–2018 for hospital-discharge records and 2014–2019 for outpatient pharmacy records.

**Supplementary Table S1.** CaReDB characteristics<sup>a</sup>.

| ATC II | Therapeutic subgroup                                                 | Prevalence of drug use (%) |      |          |      |               |      |          |      |               |      |          |      |            |      |          |      |
|--------|----------------------------------------------------------------------|----------------------------|------|----------|------|---------------|------|----------|------|---------------|------|----------|------|------------|------|----------|------|
|        |                                                                      | 0 - 39 years               |      |          |      | 40 - 59 years |      |          |      | 60 - 79 years |      |          |      | ≥ 80 years |      |          |      |
|        |                                                                      | Unadjusted                 |      | Adjusted |      | Unadjusted    |      | Adjusted |      | Unadjusted    |      | Adjusted |      | Unadjusted |      | Adjusted |      |
|        |                                                                      | C19G                       | GPG  | C19G     | GPG  | C19G          | GPG  | C19G     | GPG  | C19G          | GPG  | C19G     | GPG  | C19G       | GPG  | C19G     | GPG  |
| A02    | Acid-related Disorders                                               | 9.1                        | 6.8  | 9.6      | 6.8  | 31.6          | 26.5 | 32.4     | 26.5 | 56.2          | 56.5 | 57.7     | 56.5 | 74.7       | 75.9 | 75.2     | 75.8 |
| A07    | Antidiarrheals, Intestinal Antiinflammatory/<br>Antiinfective Agents | 4.7                        | 2.6  | 4.7      | 2.6  | 7.1           | 6.2  | 6.9      | 6.2  | 14.4          | 13.4 | 14.8     | 13.4 | 14.4       | 16.9 | 14.4     | 16.9 |
| A10    | Drugs used in diabetes                                               | < 0.1                      | 0.4  | < 0.1    | 0.4  | 4.5           | 3.7  | 4.5      | 3.7  | 18.5          | 17.2 | 17.3     | 17.2 | 26.0       | 22.0 | 25.4     | 22.0 |
| A11    | Vitamins                                                             | 2.5                        | 2.4  | 2.6      | 2.3  | 12.3          | 13.1 | 14.6     | 13.0 | 25.9          | 31.7 | 33.1     | 31.6 | 28.8       | 39.2 | 30.0     | 39.1 |
| B01    | Antithrombotic agents                                                | 2.8                        | 1.1  | 2.9      | 1.1  | 10.7          | 5.7  | 10.5     | 5.7  | 37.9          | 27.1 | 36.8     | 27.1 | 59.6       | 48.3 | 59.8     | 48.2 |
| B03    | Anti-anemia Agents                                                   | 3.8                        | 2.5  | 4.4      | 2.5  | 5.2           | 4.2  | 5.7      | 4.2  | 5.8           | 7.1  | 6.4      | 7.1  | 16.4       | 16.5 | 17.1     | 16.5 |
| C01    | Cardiac therapy                                                      | < 0.1                      | 0.1  | < 0.1    | 0.1  | 1.4           | 0.7  | 1.4      | 0.7  | 8.8           | 5.5  | 8.2      | 5.5  | 15.1       | 16.5 | 14.8     | 16.5 |
| C03    | Diuretics                                                            | 0.3                        | 0.2  | 0.4      | 0.2  | 2.4           | 2.2  | 2.4      | 2.2  | 11.9          | 11.4 | 13.0     | 11.4 | 32.9       | 32.4 | 33.3     | 32.4 |
| C07    | Beta-Blockers                                                        | 0.6                        | 0.6  | 0.6      | 0.6  | 11.9          | 10.7 | 11.8     | 10.7 | 30.5          | 32.1 | 29.8     | 32.1 | 42.5       | 43.8 | 42.5     | 43.8 |
| C08    | Calcium channel blockers                                             | 0.3                        | 0.2  | 0.3      | 0.2  | 4.9           | 3.8  | 4.4      | 3.8  | 18.1          | 15.4 | 17.3     | 15.4 | 26.0       | 24.8 | 26.0     | 24.8 |
| C09    | Drugs Acting on the Renin–Angiotensin System (RAS)                   | 1.3                        | 0.9  | 1.1      | 0.9  | 22.4          | 18.6 | 21.6     | 18.7 | 55.6          | 55.9 | 54.7     | 55.9 | 64.4       | 71.2 | 65.6     | 71.2 |
| C10    | Lipid modifying agents                                               | 0.6                        | 0.5  | 0.5      | 0.5  | 12.1          | 10.4 | 11.9     | 10.4 | 36.4          | 39.4 | 36.2     | 39.3 | 34.9       | 42.7 | 34.6     | 42.7 |
| H02    | Corticosteroids for systemic use                                     | 9.4                        | 10.6 | 9.8      | 10.6 | 14.6          | 15.1 | 15.2     | 15.1 | 20.2          | 21.1 | 20.9     | 21.1 | 28.8       | 24.3 | 28.7     | 24.3 |
| H03    | Thyroid therapy                                                      | 0.6                        | 1.1  | 0.8      | 1.1  | 4.2           | 4.5  | 4.7      | 4.5  | 6.8           | 8.2  | 8.9      | 8.2  | 7.5        | 8.2  | 7.9      | 8.2  |
| J01    | Antibacterial Drugs for Systemic Use                                 | 35.1                       | 35.2 | 35.4     | 35.1 | 43.6          | 43.8 | 45.4     | 43.7 | 61.1          | 61.5 | 62.6     | 61.4 | 70.5       | 67.8 | 70.8     | 67.8 |
| J02    | Antimycotics for systemic use                                        | 2.5                        | 1.9  | 2.7      | 1.9  | 3.8           | 3.1  | 3.7      | 3.1  | 2.7           | 3.0  | 2.8      | 3.0  | 2.7        | 2.9  | 2.9      | 2.9  |
| M01    | Anti-inflammatory and Antirheumatic Drugs                            | 8.5                        | 5.2  | 9.1      | 5.2  | 21.5          | 24.9 | 22.6     | 24.8 | 34.4          | 42.9 | 35.2     | 42.9 | 40.4       | 43.0 | 40.0     | 43.0 |
| M04    | Anti-gout Preparations                                               | < 0.1                      | 0.1  | < 0.1    | 0.1  | 3.3           | 1.2  | 3.2      | 1.2  | 9.7           | 7.3  | 9.4      | 7.3  | 19.2       | 17.9 | 19.2     | 17.9 |
| N02    | Analgesic Drugs                                                      | 1.3                        | 0.7  | 1.3      | 0.7  | 4.7           | 3.8  | 4.5      | 3.7  | 8.6           | 8.8  | 9.7      | 8.8  | 15.1       | 14.0 | 15.4     | 13.9 |
| N03    | Antiepileptics                                                       | 1.3                        | 1.2  | 1.3      | 1.2  | 4.7           | 3.4  | 5.1      | 3.4  | 7.8           | 6.5  | 8.6      | 6.5  | 13.7       | 9.4  | 14.6     | 9.4  |
| N06    | Psychoanaleptics                                                     | 0.9                        | 1.1  | 1.0      | 1.1  | 4.5           | 5.3  | 4.9      | 5.2  | 9.5           | 10.0 | 10.5     | 10.0 | 26.0       | 17.8 | 27.3     | 17.7 |
| R03    | Drugs for obstructive airway diseases                                | 10.3                       | 14.4 | 10.2     | 14.4 | 15.9          | 12.2 | 16.7     | 12.2 | 23.5          | 21.4 | 24.4     | 21.4 | 32.9       | 28.3 | 32.3     | 28.3 |
| R06    | Antihistamines for systemic use                                      | 8.5                        | 7.7  | 8.5      | 7.7  | 8.1           | 8.4  | 9.0      | 8.4  | 9.7           | 11.0 | 10.5     | 11.0 | 11.0       | 9.8  | 11.5     | 9.8  |

Supplementary Table S2. Differences in Prevalence of drug use between C19G and GPG by Therapeutic subgroup (ATC II).

| ATC II | Therapeutic subgroup                                                 | Adjusted RR<br>C19G/GPG (95%CI) |                  |                  |                  |                  |                  |                  |
|--------|----------------------------------------------------------------------|---------------------------------|------------------|------------------|------------------|------------------|------------------|------------------|
|        |                                                                      | Overall                         | Gender           |                  | Age Groups       |                  |                  |                  |
|        |                                                                      |                                 | Male             | Female           | 0 - 39 years     | 40 - 59 years    | 60 - 79 years    | ≥ 80 years       |
| A02    | Acid-related Disorders                                               | 1.12 (1.11–1.12)                | 1.05 (1.05–1.05) | 1.17 (1.17–1.17) | 1.45 (1.45–1.46) | 1.22 (1.22–1.23) | 1.02 (1.02–1.02) | 1.01 (1.01–1.02) |
| A07    | Antidiarrheals, Intestinal Antiinflammatory/<br>Antiinfective Agents | 1.17 (1.16–1.17)                | 1.22 (1.22–1.23) | 1.13 (1.12–1.13) | 1.83 (1.82–1.84) | 1.11 (1.10–1.12) | 1.11 (1.11–1.12) | 0.85 (0.84–0.86) |
| A10    | Drugs used in diabetes                                               | 1.07 (1.06–1.06)                | 1.07 (1.07–1.08) | 1.06 (1.05–1.07) | -                | 1.24 (1.23–1.25) | 1.02 (1.02–1.03) | 1.15 (1.14–1.16) |
| A11    | Vitamins                                                             | 1.02 (1.01–1.02)                | 1.08 (1.07–1.08) | 1.01 (1.00–1.01) | 1.10 (1.09–1.11) | 1.13 (1.12–1.13) | 1.05 (1.04–1.05) | 0.77 (0.76–0.77) |
| B01    | Antithrombotic agents                                                | 1.47 (1.46–1.47)                | 1.50 (1.50–1.51) | 1.44 (1.44–1.45) | 2.91 (2.88–2.95) | 1.82 (1.81–1.84) | 1.36 (1.36–1.37) | 1.30 (1.29–1.31) |
| B03    | Anti-anemia Agents                                                   | 1.28 (1.27–1.28)                | 1.02 (1.01–1.03) | 1.39 (1.38–1.40) | 1.74 (1.73–1.75) | 1.38 (1.37–1.39) | 1.06 (1.05–1.06) | 1.08 (1.07–1.09) |
| C01    | Cardiac therapy                                                      | 1.32 (1.31–1.33)                | 1.47 (1.46–1.48) | 1.20 (1.19–1.21) | 4.63 (4.40–4.87) | 2.09 (2.05–2.13) | 1.50 (1.49–1.51) | 0.94 (0.94–0.95) |
| C03    | Diuretics                                                            | 1.12 (1.11–1.12)                | 0.95 (0.95–0.96) | 1.23 (1.23–1.24) | 2.27 (2.21–2.34) | 1.09 (1.08–1.10) | 1.14 (1.14–1.15) | 1.08 (1.07–1.08) |
| C07    | Beta-Blockers                                                        | 0.98 (0.98–0.98)                | 1.09 (1.09–1.09) | 0.90 (0.90–0.91) | 1.07 (1.05–1.09) | 1.10 (1.10–1.11) | 0.93 (0.93–0.94) | 0.97 (0.97–0.98) |
| C08    | Calcium channel blockers                                             | 1.11 (1.10–1.11)                | 1.23 (1.23–1.24) | 1.00 (0.99–1.00) | 1.39 (1.36–1.43) | 1.14 (1.14–1.15) | 1.13 (1.12–1.13) | 1.05 (1.04–1.05) |
| C09    | Drugs Acting on the Renin–Angiotensin System (RAS)                   | 1.02 (1.01–1.01)                | 1.05 (1.04–1.05) | 0.99 (0.99–0.99) | 1.27 (1.26–1.29) | 1.16 (1.15–1.16) | 0.98 (0.98–0.98) | 0.93 (0.93–0.94) |
| C10    | Lipid modifying agents                                               | 0.95 (0.95–0.95)                | 0.96 (0.96–0.97) | 0.94 (0.94–0.95) | 1.13 (1.11–1.15) | 1.15 (1.14–1.15) | 0.93 (0.93–0.93) | 0.81 (0.81–0.81) |
| H02    | Corticosteroids for systemic use                                     | 1.00 (1.00–1.00)                | 0.93 (0.93–0.94) | 1.06 (1.05–1.06) | 0.92 (0.92–0.93) | 1.01 (1.01–1.01) | 0.99 (0.99–1.00) | 1.21 (1.20–1.22) |
| H03    | Thyroid therapy                                                      | 1.02 (1.02–1.02)                | 0.97 (0.96–0.98) | 1.04 (1.03–1.04) | 0.71 (0.70–0.72) | 1.06 (1.05–1.06) | 1.09 (1.09–1.10) | 0.96 (0.95–0.98) |
| J01    | Antibacterial Drugs for Systemic Use                                 | 1.02 (1.02–1.02)                | 1.00 (1.00–1.00) | 1.05 (1.04–1.05) | 1.01 (1.00–1.01) | 1.04 (1.03–1.04) | 1.02 (1.02–1.02) | 1.04 (1.04–1.05) |
| J02    | Antimycotics for systemic use                                        | 1.17 (1.16–1.17)                | 1.41 (1.40–1.43) | 1.03 (1.03–1.04) | 1.43 (1.42–1.44) | 1.18 (1.17–1.19) | 0.91 (0.90–0.92) | 0.98 (0.96–1.00) |
| M01    | Anti-inflammatory and Antirheumatic Drugs                            | 0.95 (0.95–0.95)                | 0.92 (0.91–0.92) | 0.98 (0.98–0.98) | 1.74 (1.73–1.75) | 0.91 (0.91–0.91) | 0.82 (0.82–0.82) | 0.93 (0.93–0.94) |
| M04    | Anti-gout Preparations                                               | 1.37 (1.36–1.37)                | 1.20 (1.19–1.21) | 1.55 (1.54–1.56) | -                | 2.63 (2.60–2.67) | 1.30 (1.30–1.31) | 1.12 (1.11–1.13) |
| N02    | Analgesic Drugs                                                      | 1.20 (1.19–1.20)                | 1.41 (1.40–1.42) | 1.09 (1.09–1.10) | 1.94 (1.91–1.97) | 1.27 (1.26–1.28) | 1.11 (1.10–1.11) | 1.10 (1.09–1.11) |
| N03    | Antiepileptics                                                       | 1.39 (1.38–1.40)                | 0.99 (0.99–1.00) | 1.69 (1.68–1.70) | 1.11 (1.10–1.12) | 1.52 (1.51–1.53) | 1.32 (1.31–1.33) | 1.55 (1.53–1.57) |
| N06    | Psychoanalptics                                                      | 1.12 (1.11–1.12)                | 1.00 (0.99–1.00) | 1.18 (1.17–1.18) | 0.93 (0.92–0.94) | 0.93 (0.92–0.94) | 1.05 (1.04–1.06) | 1.54 (1.53–1.55) |
| R03    | Drugs for obstructive airway diseases                                | 1.05 (1.04–1.04)                | 1.00 (1.00–1.01) | 1.08 (1.08–1.08) | 0.71 (0.71–0.71) | 1.37 (1.37–1.38) | 1.15 (1.15–1.16) | 1.14 (1.13–1.15) |
| R06    | Antihistamines for systemic use                                      | 1.06 (1.05–1.06)                | 0.95 (0.94–0.95) | 1.14 (1.14–1.15) | 1.10 (1.09–1.10) | 1.07 (1.07–1.08) | 0.96 (0.96–0.97) | 1.18 (1.17–1.19) |

Supplementary Table S3. Gender and Age group differences in drug use between C19G and GPG by Pharmacological group (ATC II).

|        |                                                | Prevalence of drug use (%) |      |          |      |               |      |          |      |               |      |          |      |            |      |          |      |
|--------|------------------------------------------------|----------------------------|------|----------|------|---------------|------|----------|------|---------------|------|----------|------|------------|------|----------|------|
| ATC IV | Chemical subgroup                              | 0 - 39 years               |      |          |      | 40 - 59 years |      |          |      | 60 - 79 years |      |          |      | ≥ 80 years |      |          |      |
|        |                                                | Unadjusted                 |      | Adjusted |      | Unadjusted    |      | Adjusted |      | Unadjusted    |      | Adjusted |      | Unadjusted |      | Adjusted |      |
|        |                                                | C19G                       | GPG  | C19G     | GPG  | C19G          | GPG  | C19G     | GPG  | C19G          | GPG  | C19G     | GPG  | C19G       | GPG  | C19G     | GPG  |
| A02AD  | Aluminium, calcium and magnesium               | 0.9                        | 1.0  | 0.9      | 1.0  | 4.7           | 3.6  | 5.0      | 3.6  | 6.2           | 6.4  | 5.9      | 6.4  | 6.2        | 6.1  | 6.9      | 6.1  |
| A02BC  | Proton pump inhibitors                         | 6.3                        | 5.2  | 6.8      | 5.2  | 29.5          | 22.8 | 30.1     | 22.8 | 53.1          | 52.7 | 54.5     | 52.7 | 74.0       | 73.6 | 74.4     | 73.5 |
| A02BX  | Other drugs for peptic ulcers                  | 2.8                        | 1.8  | 3.0      | 1.8  | 6.3           | 6.2  | 6.4      | 6.1  | 9.9           | 10.2 | 10.8     | 10.2 | 7.5        | 9.4  | 7.5      | 9.4  |
| A07AA  | Antibiotics                                    | 2.8                        | 2.2  | 2.8      | 2.2  | 4.9           | 4.8  | 5.0      | 4.8  | 10.7          | 11.3 | 11.4     | 11.3 | 13.0       | 15.3 | 13.3     | 15.2 |
| A10BA  | Biguanides                                     | <0.1                       | 0.2  | <0.1     | 0.2  | 3.4           | 2.7  | 3.4      | 2.7  | 12.6          | 11.6 | 11.5     | 11.6 | 15.1       | 10.7 | 14.6     | 10.7 |
| A11CC  | Vitamin D and analogues                        | 2.5                        | 2.3  | 2.6      | 2.3  | 12.3          | 13.1 | 14.6     | 13.0 | 25.9          | 31.7 | 33.1     | 31.6 | 28.8       | 39.2 | 30.0     | 39.1 |
| B01AB  | Heparin group                                  | 2.2                        | 0.8  | 2.3      | 0.8  | 3.6           | 1.8  | 4.1      | 1.8  | 7.2           | 4.6  | 7.1      | 4.6  | 11.0       | 8.2  | 10.6     | 8.2  |
| B01AC  | Platelet aggregation inhibitors                | 0.6                        | 0.3  | 0.5      | 0.3  | 6.7           | 4.0  | 6.1      | 4.0  | 30.7          | 23.3 | 29.7     | 23.3 | 45.2       | 40.8 | 46.1     | 40.8 |
| B03BB  | Folic acid and derivatives                     | 2.8                        | 1.5  | 3.3      | 1.5  | 3.3           | 2.4  | 3.2      | 2.4  | 3.9           | 4.4  | 4.1      | 4.4  | 9.6        | 9.6  | 9.8      | 9.6  |
| C03CA  | Sulfonamides                                   | 0.3                        | 0.1  | 0.4      | 0.1  | 0.9           | 1.5  | 0.9      | 1.5  | 8.8           | 8.7  | 9.8      | 8.7  | 27.4       | 27.5 | 27.7     | 27.5 |
| C07AB  | β blocking agents, selective                   | 0.3                        | 0.4  | 0.3      | 0.4  | 8.9           | 8.0  | 8.6      | 8.0  | 24.7          | 24.9 | 24.1     | 24.9 | 34.2       | 34.5 | 33.7     | 34.5 |
| C08CA  | Dihydropyridine derivatives                    | 0.3                        | 0.2  | 0.3      | 0.2  | 4.7           | 3.7  | 4.3      | 3.7  | 16.9          | 14.6 | 16.5     | 14.6 | 22.6       | 22.8 | 22.7     | 22.7 |
| C09AA  | ACE inhibitors                                 | 0.3                        | 0.3  | 0.3      | 0.3  | 5.6           | 5.5  | 5.3      | 5.5  | 14.8          | 15.3 | 13.6     | 15.3 | 18.5       | 20.9 | 18.3     | 20.9 |
| C09BA  | ACE inhibitors and diuretics                   | <0.1                       | 0.1  | <0.1     | 0.1  | 2.9           | 2.7  | 3.0      | 2.7  | 9.1           | 9.0  | 9.1      | 9.0  | 8.9        | 11.9 | 9.2      | 11.9 |
| C09CA  | Angiotensin II receptor blockers               | 0.6                        | 0.2  | 0.5      | 0.2  | 6.3           | 5.0  | 6.0      | 5.0  | 16.7          | 15.4 | 16.0     | 15.4 | 22.6       | 21.2 | 24.2     | 21.2 |
| C09DA  | Angiotensin II receptor blockers and diuretics | 0.3                        | 0.1  | 0.3      | 0.1  | 5.2           | 3.8  | 5.0      | 3.8  | 15.2          | 14.9 | 16.7     | 14.9 | 16.4       | 20.0 | 16.5     | 20.0 |
| C10AA  | HMG CoA reductase inhibitors                   | 0.6                        | 0.3  | 0.5      | 0.3  | 9.4           | 8.4  | 9.2      | 8.4  | 31.3          | 34.6 | 31.1     | 34.5 | 30.8       | 38.9 | 30.4     | 38.9 |
| H02AB  | Glucocorticoids                                | 9.4                        | 10.6 | 9.8      | 10.6 | 14.6          | 15.1 | 15.2     | 15.1 | 20.2          | 21.1 | 20.9     | 21.1 | 28.8       | 24.3 | 28.7     | 24.3 |
| H03AA  | Thyroid hormones                               | 0.6                        | 1.0  | 0.8      | 1.0  | 4.2           | 4.3  | 4.7      | 4.3  | 5.6           | 7.5  | 7.9      | 7.5  | 6.8        | 6.5  | 7.1      | 6.5  |
| J01CA  | Penicillins with extended spectrum             | 2.8                        | 3.1  | 2.6      | 3.1  | 3.4           | 3.8  | 3.6      | 3.8  | 4.5           | 6.0  | 4.7      | 6.0  | 3.4        | 5.0  | 3.5      | 5.0  |
| J01CR  | Combinations of penicillins                    | 16.3                       | 17.1 | 16.2     | 17.0 | 19.7          | 21.6 | 20.2     | 21.5 | 29.0          | 29.1 | 29.6     | 29.0 | 26.7       | 27.4 | 27.3     | 27.4 |
| J01DD  | Third-generation cephalosporins                | 11.6                       | 9.8  | 11.8     | 9.8  | 12.1          | 11.9 | 12.5     | 11.9 | 19.1          | 20.0 | 19.1     | 20.0 | 38.4       | 29.1 | 37.3     | 29.1 |

|              |                                                                                              |       |      |       |      |      |      |      |      |      |      |      |      |      |      |      |      |
|--------------|----------------------------------------------------------------------------------------------|-------|------|-------|------|------|------|------|------|------|------|------|------|------|------|------|------|
| <b>J01FA</b> | <b>Macrolides</b>                                                                            | 10.3  | 11.0 | 10.5  | 11.0 | 15.0 | 11.9 | 16.2 | 11.9 | 16.1 | 16.5 | 16.6 | 16.5 | 12.3 | 16.5 | 12.9 | 16.5 |
| <b>J01MA</b> | <b>Fluoroquinolones</b>                                                                      | 3.4   | 3.2  | 3.7   | 3.2  | 12.7 | 10.2 | 13.1 | 10.2 | 19.5 | 20.9 | 19.7 | 20.9 | 28.8 | 28.2 | 29.0 | 28.2 |
| <b>J01XX</b> | <b>Other antibacterials</b>                                                                  | 1.6   | 1.9  | 1.8   | 1.9  | 5.6  | 4.6  | 6.7  | 4.5  | 7.2  | 8.3  | 9.0  | 8.3  | 8.9  | 13.0 | 9.0  | 12.9 |
| <b>J02AC</b> | <b>Antimycotics For Systemic Use</b>                                                         | 2.5   | 1.9  | 2.7   | 1.9  | 3.8  | 3.1  | 3.7  | 3.1  | 2.7  | 3.0  | 2.8  | 3.0  | 2.7  | 2.9  | 2.9  | 2.9  |
| <b>M01AB</b> | <b>Acetic acid derivatives and related substance</b>                                         | 3.4   | 1.7  | 3.5   | 1.7  | 8.5  | 9.8  | 8.7  | 9.8  | 16.1 | 18.4 | 16.9 | 18.4 | 17.1 | 18.3 | 17.1 | 18.3 |
| <b>M01AE</b> | <b>Propionic acid derivatives</b>                                                            | 4.7   | 3.0  | 5.2   | 3.0  | 9.8  | 13.3 | 10.5 | 13.2 | 18.1 | 22.0 | 18.3 | 22.0 | 18.5 | 21.5 | 18.5 | 21.5 |
| <b>M01AH</b> | <b>Coxibs</b>                                                                                | 0.3   | 0.3  | 0.3   | 0.3  | 2.7  | 3.3  | 3.0  | 3.3  | 6.6  | 8.1  | 7.5  | 8.1  | 8.9  | 8.0  | 8.8  | 8.0  |
| <b>M01AX</b> | <b>Other antiinflammatory and antirheumatic agents non-steroidal anti-inflammatory drugs</b> | 0.9   | 0.9  | 1.0   | 0.8  | 2.9  | 5.0  | 2.6  | 4.9  | 5.6  | 9.7  | 5.2  | 9.7  | 8.9  | 9.2  | 8.5  | 9.2  |
| <b>M04AA</b> | <b>Preparations inhibiting uric acid production</b>                                          | < 0.1 | 0.1  | < 0.1 | 0.1  | 2.9  | 1.2  | 2.8  | 1.2  | 9.1  | 7.1  | 8.5  | 7.1  | 19.2 | 17.7 | 19.2 | 17.7 |
| <b>N03AX</b> | <b>Other antiepileptics</b>                                                                  | 0.6   | 0.6  | 0.6   | 0.6  | 2.9  | 2.2  | 3.4  | 2.2  | 5.3  | 5.1  | 5.5  | 5.1  | 11.0 | 7.2  | 11.7 | 7.2  |
| <b>N06AB</b> | <b>Selective serotonin reuptake inhibitors</b>                                               | 0.3   | 0.8  | 0.4   | 0.8  | 3.1  | 3.8  | 3.3  | 3.8  | 4.7  | 6.9  | 5.4  | 6.9  | 11.6 | 11.1 | 12.5 | 11.1 |
| <b>N06AX</b> | <b>Other antidepressants</b>                                                                 | 0.6   | 0.3  | 0.6   | 0.3  | 1.4  | 1.6  | 1.5  | 1.6  | 5.1  | 3.6  | 5.2  | 3.6  | 15.1 | 7.9  | 15.9 | 7.9  |
| <b>R03AK</b> | <b>Adrenergics in combination with corticosteroids</b>                                       | 1.6   | 1.8  | 1.6   | 1.8  | 5.8  | 4.0  | 6.1  | 4.0  | 7.6  | 8.1  | 7.2  | 8.1  | 10.3 | 10.9 | 9.8  | 10.9 |
| <b>R03BA</b> | <b>Glucocorticoids</b>                                                                       | 8.2   | 11.5 | 8.1   | 11.4 | 9.6  | 7.3  | 10.4 | 7.3  | 14.0 | 11.4 | 14.9 | 11.4 | 13.7 | 14.1 | 13.7 | 14.1 |
| <b>R03BB</b> | <b>Anticholinergics</b>                                                                      | 0.3   | 0.2  | 0.3   | 0.2  | 1.3  | 1.0  | 1.1  | 1.0  | 6.8  | 5.2  | 6.6  | 5.2  | 13.0 | 9.7  | 11.9 | 9.8  |
| <b>R06AE</b> | <b>Piperazine derivatives</b>                                                                | 4.7   | 4.3  | 4.7   | 4.3  | 4.3  | 3.9  | 4.8  | 3.9  | 4.9  | 5.8  | 5.3  | 5.8  | 6.8  | 5.5  | 7.1  | 5.5  |
| <b>R06AX</b> | <b>Other antihistamines for systemic use</b>                                                 | 4.1   | 3.8  | 4.1   | 3.8  | 4.2  | 5.0  | 4.7  | 4.9  | 5.6  | 5.9  | 6.3  | 5.9  | 4.1  | 5.0  | 4.4  | 5.0  |

**Supplementary Table S4.** Differences in Prevalence of drug use between C19G and GPG by Chemical Subgroup (ATC IV).

| ATC IV | Chemical subgroup                              | Adjusted RR<br>C19G/GPG (95%CI) |                  |                  |                  |                  |                  |                  |
|--------|------------------------------------------------|---------------------------------|------------------|------------------|------------------|------------------|------------------|------------------|
|        |                                                | Overall                         | Gender           |                  | Age Groups       |                  |                  |                  |
|        |                                                |                                 | Male             | Female           | 0 - 39 years     | 40 - 59 years    | 60 - 79 years    | ≥ 80 years       |
| A02AD  | Aluminium, calcium and magnesium               | 1.10 (1.09–1.11)                | 1.14 (1.13–1.15) | 1.08 (1.07–1.09) | 0.92 (0.91–0.93) | 1.39 (1.37–1.40) | 0.92 (0.92–0.93) | 1.14 (1.12–1.15) |
| A02BC  | Proton pump inhibitors                         | 1.14 (1.13–1.14)                | 1.06 (1.06–1.06) | 1.20 (1.19–1.20) | 1.36 (1.35–1.37) | 1.32 (1.32–1.33) | 1.03 (1.03–1.04) | 1.03 (1.03–1.04) |
| A02BX  | Other drugs for peptic ulcers                  | 1.10 (1.09–1.11)                | 1.06 (1.06–1.07) | 1.13 (1.12–1.13) | 1.69 (1.67–1.70) | 1.05 (1.04–1.05) | 1.06 (1.06–1.06) | 0.80 (0.79–0.80) |
| A07AA  | Antibiotics                                    | 1.03 (1.02–1.03)                | 1.06 (1.05–1.06) | 1.01 (1.01–1.02) | 1.28 (1.27–1.29) | 1.04 (1.03–1.04) | 1.01 (1.01–1.02) | 0.87 (0.86–0.88) |
| A10BA  | Biguanides                                     | 1.09 (1.08–1.09)                | 1.16 (1.15–1.17) | 1.01 (1.00–1.01) | -                | 1.24 (1.22–1.25) | 0.98 (0.98–0.99) | 1.36 (1.35–1.38) |
| A11CC  | Vitamin D and analogues                        | 1.02 (1.01–1.02)                | 1.08 (1.07–1.09) | 1.01 (1.00–1.01) | 1.10 (1.09–1.11) | 1.13 (1.12–1.13) | 1.05 (1.05–1.05) | 0.77 (0.76–0.77) |
| B01AB  | Heparin group                                  | 1.88 (1.87–1.89)                | 1.93 (1.92–1.95) | 1.85 (1.84–1.87) | 3.19 (3.15–3.23) | 2.27 (2.24–2.29) | 1.55 (1.55–1.56) | 1.38 (1.37–1.40) |
| B01AC  | Platelet aggregation inhibitors                | 1.29 (1.28–1.29)                | 1.32 (1.32–1.33) | 1.26 (1.26–1.27) | 1.94 (1.89–1.98) | 1.52 (1.51–1.53) | 1.28 (1.28–1.29) | 1.18 (1.18–1.19) |
| B03BB  | Folic acid and derivatives                     | 1.31 (1.30–1.32)                | 1.27 (1.26–1.28) | 1.33 (1.32–1.33) | 2.22 (2.19–2.24) | 1.36 (1.35–1.38) | 0.93 (0.93–0.93) | 1.02 (1.01–1.03) |
| C03CA  | Sulfonamides                                   | 1.07 (1.06–1.07)                | 0.86 (0.86–0.87) | 1.20 (1.19–1.21) | -                | 0.59 (0.59–0.60) | 1.13 (1.13–1.14) | 1.06 (1.06–1.07) |
| C07AB  | β blocking agents, selective                   | 0.99 (0.98–0.99)                | 1.15 (1.14–1.15) | 0.87 (0.87–0.87) | -                | 1.07 (1.06–1.07) | 0.98 (0.98–0.98) | 0.98 (0.97–0.98) |
| C08CA  | Dihydropyridine derivatives                    | 1.11 (1.10–1.11)                | 1.19 (1.18–1.19) | 1.03 (1.03–1.04) | -                | 1.16 (1.15–1.16) | 1.14 (1.14–1.15) | 1.00 (0.99–1.00) |
| C09AA  | ACE inhibitors                                 | 0.91 (0.90–0.91)                | 0.96 (0.96–0.97) | 0.84 (0.84–0.85) | -                | 0.97 (0.96–0.97) | 0.89 (0.89–0.90) | 0.87 (0.87–0.88) |
| C09BA  | ACE inhibitors and diuretics                   | 0.97 (0.96–0.97)                | 0.95 (0.94–0.96) | 0.98 (0.97–0.98) | -                | 1.09 (1.08–1.10) | 1.02 (1.02–1.02) | 0.78 (0.77–0.78) |
| C09CA  | Angiotensin II receptor blockers               | 1.13 (1.12–1.14)                | 1.16 (1.15–1.16) | 1.11 (1.11–1.12) | 2.33 (2.27–2.39) | 1.20 (1.19–1.21) | 1.05 (1.05–1.05) | 1.18 (1.17–1.19) |
| C09DA  | Angiotensin II receptor blockers and diuretics | 1.10 (1.09–1.11)                | 1.13 (1.13–1.14) | 1.08 (1.08–1.09) | -                | 1.34 (1.33–1.35) | 1.12 (1.12–1.12) | 0.83 (0.82–0.83) |
| C10AA  | HMG CoA reductase inhibitors                   | 0.92 (0.92–0.93)                | 0.97 (0.96–0.97) | 0.89 (0.88–0.89) | 1.78 (1.74–1.82) | 1.09 (1.09–1.10) | 0.91 (0.91–0.91) | 0.78 (0.78–0.79) |
| H02AB  | Glucocorticoids                                | 1.00 (1.00–1.01)                | 0.93 (0.93–0.94) | 1.06 (1.05–1.06) | 0.92 (0.92–0.93) | 1.01 (1.01–1.01) | 0.99 (0.99–1.00) | 1.21 (1.20–1.22) |
| H03AA  | Thyroid hormones                               | 1.05 (1.04–1.05)                | 0.89 (0.88–0.90) | 1.08 (1.08–1.09) | 0.75 (0.74–0.76) | 1.11 (1.10–1.12) | 1.06 (1.06–1.06) | 1.09 (1.08–1.11) |

|              |                                                                                                     |                  |                  |                  |                  |                  |                  |                  |
|--------------|-----------------------------------------------------------------------------------------------------|------------------|------------------|------------------|------------------|------------------|------------------|------------------|
| <b>J01CA</b> | <b>Penicillins with extended spectrum</b>                                                           | 0.83 (0.83–0.84) | 0.97 (0.96–0.97) | 0.73 (0.73–0.74) | 0.84 (0.84–0.85) | 0.94 (0.93–0.94) | 0.77 (0.77–0.78) | 0.69 (0.68–0.70) |
| <b>J01CR</b> | <b>Combinations of penicillins</b>                                                                  | 0.97 (0.97–0.97) | 0.96 (0.96–0.97) | 0.98 (0.98–0.98) | 0.95 (0.95–0.95) | 0.94 (0.94–0.94) | 1.02 (1.02–1.02) | 1.00 (0.99–1.00) |
| <b>J01DD</b> | <b>Third-generation cephalosporins</b>                                                              | 1.10 (1.09–1.10) | 1.09 (1.08–1.09) | 1.11 (1.11–1.11) | 1.20 (1.20–1.21) | 1.05 (1.05–1.06) | 0.96 (0.96–0.96) | 1.28 (1.27–1.29) |
| <b>J01FA</b> | <b>Macrolides</b>                                                                                   | 1.07 (1.06–1.07) | 0.94 (0.94–0.95) | 1.17 (1.17–1.17) | 0.95 (0.95–0.96) | 1.37 (1.36–1.37) | 1.01 (1.01–1.01) | 0.78 (0.77–0.79) |
| <b>J01MA</b> | <b>Fluoroquinolones</b>                                                                             | 1.09 (1.08–1.09) | 0.99 (0.98–0.99) | 1.16 (1.16–1.17) | 1.17 (1.16–1.17) | 1.29 (1.28–1.29) | 0.95 (0.95–0.95) | 1.03 (1.02–1.04) |
| <b>J01XX</b> | <b>Other antibacterials</b>                                                                         | 1.11 (1.10–1.11) | 1.15 (1.14–1.16) | 1.10 (1.09–1.10) | 0.94 (0.93–0.95) | 1.48 (1.47–1.49) | 1.09 (1.09–1.10) | 0.70 (0.69–0.71) |
| <b>J02AC</b> | <b>Antimycotics for systemic use</b>                                                                | 1.17 (1.16–1.17) | 1.41 (1.40–1.43) | 1.03 (1.03–1.04) | 1.43 (1.42–1.44) | 1.18 (1.17–1.19) | 0.91 (0.91–0.92) | 0.98 (0.96–1.00) |
| <b>M01AB</b> | <b>Acetic acid derivatives and related sub</b>                                                      | 1.00 (0.99–1.00) | 1.04 (1.04–1.05) | 0.97 (0.96–0.97) | 2.07 (2.05–2.09) | 0.89 (0.88–0.89) | 0.92 (0.92–0.92) | 0.94 (0.93–0.94) |
| <b>M01AE</b> | <b>Propionic acid derivatives</b>                                                                   | 0.92 (0.91–0.92) | 0.82 (0.81–0.82) | 0.98 (0.98–0.99) | 1.75 (1.73–1.76) | 0.79 (0.79–0.80) | 0.83 (0.83–0.83) | 0.86 (0.85–0.87) |
| <b>M01AH</b> | <b>Coxibs</b>                                                                                       | 0.94 (0.93–0.95) | 0.99 (0.98–0.99) | 0.92 (0.92–0.93) | -                | 0.90 (0.89–0.90) | 0.93 (0.93–0.93) | 1.10 (1.09–1.12) |
| <b>M01AX</b> | <b>Other antiinflammatory and antirheumatic non-steroids, non-steroidal anti-inflammatory drugs</b> | 0.63 (0.63–0.64) | 0.91 (0.91–0.92) | 0.45 (0.45–0.45) | 1.20 (1.19–1.22) | 0.53 (0.52–0.53) | 0.53 (0.53–0.53) | 0.92 (0.91–0.93) |
| <b>M04AA</b> | <b>Preparations inhibiting uric acid production</b>                                                 | 1.29 (1.28–1.30) | 1.22 (1.22–1.23) | 1.37 (1.36–1.38) | -                | 2.36 (2.33–2.40) | 1.21 (1.21–1.22) | 1.13 (1.12–1.14) |
| <b>N03AX</b> | <b>Other antiepileptics</b>                                                                         | 1.30 (1.29–1.31) | 0.91 (0.90–0.92) | 1.55 (1.54–1.56) | 1.03 (1.01–1.04) | 1.53 (1.51–1.54) | 1.08 (1.08–1.09) | 1.62 (1.60–1.64) |
| <b>N06AB</b> | <b>Selective serotonin reuptake inhibitors</b>                                                      | 0.86 (0.85–0.86) | 0.67 (0.66–0.67) | 0.95 (0.94–0.95) | -                | 0.87 (0.86–0.88) | 0.79 (0.79–0.80) | 1.13 (1.12–1.14) |
| <b>N06AX</b> | <b>Other antidepressants</b>                                                                        | 1.54 (1.53–1.55) | 1.46 (1.45–1.48) | 1.58 (1.57–1.59) | 2.34 (2.29–2.39) | 0.96 (0.95–0.97) | 1.44 (1.44–1.45) | 2.02 (2.00–2.05) |
| <b>R03AK</b> | <b>Adrenergics in combination with corticosteroids</b>                                              | 1.06 (1.05–1.07) | 1.11 (1.11–1.12) | 1.02 (1.01–1.02) | 0.88 (0.87–0.89) | 1.53 (1.52–1.54) | 0.89 (0.89–0.89) | 0.90 (0.89–0.91) |
| <b>R03BA</b> | <b>Glucocorticoids</b>                                                                              | 1.03 (1.03–1.04) | 0.95 (0.95–0.95) | 1.10 (1.10–1.11) | 0.71 (0.70–0.71) | 1.42 (1.41–1.43) | 1.31 (1.31–1.32) | 0.97 (0.96–0.97) |
| <b>R03BB</b> | <b>Anticholinergics</b>                                                                             | 1.25 (1.24–1.26) | 1.44 (1.43–1.45) | 1.03 (1.02–1.04) | -                | 1.10 (1.08–1.12) | 1.29 (1.29–1.30) | 1.23 (1.21–1.24) |
| <b>R06AE</b> | <b>Piperazine derivatives</b>                                                                       | 1.10 (1.09–1.10) | 1.00 (0.99–1.00) | 1.17 (1.16–1.18) | 1.10 (1.09–1.11) | 1.23 (1.22–1.24) | 0.90 (0.90–0.91) | 1.30 (1.28–1.32) |
| <b>R06AX</b> | <b>Other antihistamines for systemic use</b>                                                        | 1.02 (1.01–1.02) | 0.82 (0.81–0.82) | 1.17 (1.16–1.17) | 1.09 (1.08–1.09) | 0.94 (0.94–0.95) | 1.07 (1.07–1.08) | 0.88 (0.87–0.89) |

**Supplementary Table S5.** Gender and Age group differences in drug use between C19G and GPG by Chemical Pharmacological Subgroup (ATC IV)
